# Supplementary material for: Isolation and identification of flavonoid-producing endophytic fungi from medicinal plant Conyza blinii H.Lév that exhibit higher antioxidant and antibacterial activities
Source: PeerJ. 2020 Apr 15;8:e8978. doi: 10.7717/peerj.8978 (PMC7166047; doi:10.7717/peerj.8978)
Supplement: Data S2 [file peerj-08-8978-s003.xls]

## Sheet: Sheet1
Free radical scavenging rate of DPPH(%)								Free radical scavenging rate of ABTS(%)								Fe3+ reducing power(%)							Hydroxyl radical scavenging rate（%）								Total oxidation resistance of T-AOC		Antimicrobial activity					Total flavonoids content
Concentration(mg/mL)	0	0.2	0.4	0.6	0.8	1	IC50	Concentration(mg/mL)	0	0.2	0.4	0.6	0.8	1	IC50	Concentration(mg/mL)	0	0.2	0.4	0.6	0.8	1	Concentration(mg/mL)	0	0.2	0.4	0.6	0.8	1	IC50				Escherichia coli	Staphylococcus aureus	Pseudomonas aeruginosa	Bacillus subtilis
CBL1	0	0.676976	0.883162	0.932131	0.960309	0.949828	0.14	CBL1	0	0.321527	0.536935	0.714581	0.850193	0.928335	0.354	CBL1	0.0323	0.3275	0.6147	0.7099	0.9954	1.0016	CBL1	0	0.054151	0.0963981	0.151616	0.238814	0.367609	1.25	CBL1	971.4	CBL1	0	0	0	0	CBL1	4.02897
	0	0.666721	0.895091	0.948449	0.96503	0.946314	0.151		0	0.300086	0.521547	0.695776	0.887129	0.968037	0.374		0.055	0.3423	0.6118	0.8257	0.944	1.1244		0	0.042829	0.0848237	0.235667	0.223681	0.304574	1.44		972.4		0	0	0	0		3.81315
	0	0.687789	0.89505	0.922607	0.949505	0.940429	0.143		0	0.310494	0.520369	0.725781	0.888297	0.914352	0.356		0.0389	0.3942	0.6832	0.9298	0.9036	1.1557		0	0.0462313	0.111889	0.197456	0.251945	0.361138	1.35		971.1		0	0	0	0		3.9088
Standard deviation of CBL1	0	0.0105349	0.00687558	0.0130687	0.00795886	0.00474916	0.00568624	Standard deviation of CBL1	0	0.0107222	0.00924329	0.0151621	0.0216701	0.0278503	0.0110151	Standard deviation of CBL1	0.0116766	0.0350275	0.0404117	0.110002	0.0460097	0.0814518	Standard deviation of CBL1	0	0.00580925	0.0135799	0.0420831	0.014144	0.0346764	0.0950438	Standard deviation of CBL1	0.680686	Standard deviation of CBL1	0	0	0	0	Standard deviation of CBL1	0.11
CBL1-1	0	0.331687	0.551956	0.7339	0.848479	0.976096	0.345	CBL1-1	0	0.121538	0.229308	0.356227	0.426017	0.546131	0.917	CBL1-1	0.0251	0.1356	0.2548	0.2583	0.4771	0.5301	CBL1-1	0	0.567596	0.559159	0.620812	0.631896	0.795731	0.164	CBL1-1	965.1	CBL1-1	15	16	14	19	CBL1-1	6.40822
	0	0.392538	0.571901	0.731053	0.848426	0.977264	0.311		0	0.130572	0.237833	0.351551	0.410458	0.532052	0.953		0.021	0.1186	0.203	0.3266	0.4035	0.5434		0	0.522222	0.755781	0.648801	0.708077	0.697517	0.178		965		12	14	13	17		6.28362
	0	0.397743	0.57015	0.750535	0.867289	0.983265	0.305		0	0.146455	0.252124	0.367527	0.443998	0.51429	0.954		-0.0051	0.1557	0.3091	0.2765	0.4275	0.4259		0	0.476575	0.640832	0.705653	0.64583	0.73529	0.215		964.3		11	17	15	16		6.7536
Standard deviation of CBL1-1	0	0.0367271	0.0110445	0.0105229	0.0108755	0.00384645	0.0215716	Standard deviation of CBL1-1	0	0.0126141	0.0115287	0.00821328	0.0167845	0.0159558	0.0210792	Standard deviation of CBL1-1	0.0163812	0.0185716	0.0530549	0.0353698	0.0375347	0.0643438	Standard deviation of CBL1-1	0	0.0455106	0.0987789	0.0432313	0.0405635	0.0495408	0.0263502	Standard deviation of CBL1-1	0.43589	Standard deviation of CBL1-1	2.08167	1.52753	1	1.52753	Standard deviation of CBL1-1	0.24
CBL9	0	0.802082	0.939425	0.929594	0.953737	0.939425	0.149	CBL9	0	0.144006	0.240011	0.296192	0.537007	0.466479	1.07	CBL9	0.0215	0.1657	0.2985	0.4009	0.4377	0.4899	CBL9	0	0.129679	0.289831	0.24664	0.5062	0.5772	0.857	CBL9	961.6	CBL9	26	22	18	23	CBL4	1.78285
	0	0.751607	0.953828	0.951783	0.948714	0.9455	0.183		0	0.0582142	0.169098	0.289758	0.463817	0.407207	1.11		0.0248	0.1752	0.2959	0.3701	0.4269	0.433		0	0.0532559	0.226615	0.351362	0.53575	0.536351	0.818		962		24	17	15	25		2.3588
	0	0.885981	0.948239	0.963911	0.954277	0.9422	0.12		0	0.0645712	0.165268	0.280188	0.434789	0.405348	1.25		0.0349	0.1575	0.2839	0.2662	0.3567	0.4677		0	0.070549	0.235154	0.283775	0.535598	0.607247	0.819		963		24	20	19	21		1.8113
Standard deviation of CBL9	0	0.0678764	0.00726169	0.0174026	0.00306791	0.00304132	0.0315331	Standard deviation of CBL9	0	0.0478029	0.0420906	0.00805317	0.0526752	0.0347697	0.0945163	Standard deviation of CBL9	0.00698164	0.00885795	0.00778802	0.0705785	0.0439805	0.0286779	Standard deviation of CBL9	0	0.0400746	0.0342996	0.0530939	0.0170173	0.0355846	0.0222336	Standard deviation of CBL9	0.72111	Standard deviation of CBL9	1.1547	2.51661	2.08167	2	Standard deviation of CBL4	0.32
CBL11	0	0.220181	0.328313	0.451958	0.517169	0.645181	0.709	CBL11	0	0.268505	0.470352	0.699237	0.83282	0.966002	0.409	CBL11	0.0294	0.2143	0.4024	0.5448	0.6997	0.8515	CBL11	0	0.332902	0.344531	0.478577	0.499326	0.56447	0.758	CBL11	962.1	CBL11	16	12	10	10	CBL4-1	3.1038
	0	0.215805	0.283131	0.472036	0.522948	0.615198	0.731		0	0.278671	0.525606	0.698992	0.843639	0.966222	0.383		0.0304	0.1759	0.2925	0.5836	0.7554	0.7881		0	0.3574	0.443593	0.454565	0.43469	0.505552	1.12		962.2		18	11	11	11		3.36578
	0	0.210037	0.387266	0.460375	0.542322	0.610487	0.664		0	0.240993	0.616949	0.716976	0.835289	0.926856	0.342		0.0268	0.2251	0.3931	0.4987	0.7419	0.7199		0	0.407812	0.4916	0.483286	0.601759	0.553933	0.498		963		17	10	7	7		2.89473
Standard deviation of CBL11	0	0.00508755	0.0522191	0.0100829	0.0131747	0.0188186	0.0341516	Standard deviation of CBL11	0	0.0194927	0.074035	0.010313	0.00566969	0.0226647	0.0337787	Standard deviation of CBL11	0.00185831	0.0258581	0.0609438	0.0425023	0.0290562	0.0658146	Standard deviation of CBL11	0	0.0381947	0.0749966	0.0154035	0.0842442	0.0314194	0.312391	Standard deviation of CBL11	0.493288	Standard deviation of CBL11	1	1	2.08167	2.08167	Standard deviation of CBL4-1	0.24
CBL12	0	0.946751	0.949387	0.949255	0.948992	0.942665	0.1056	CBL12	0	0.482173	0.998035	1.00674	0.998596	1.01039	0.057	CBL12	0.1193	0.7614	1.3633	1.5906	1.9432	2.3327	CBL12	0	0.513505	0.802758	0.810295	0.83521	0.793111	0.196	CBL12	1016.9	CBL12	0	0	0	0	CBL7	2.53538
	0	0.944312	0.94193	0.938058	0.942376	0.945652	0.1058		0	0.548682	1.01062	1.00807	1.03335	1.01022	0.16		0.0449	0.8759	1.2664	1.4681	1.8929	2.3694		0	0.478839	0.793462	0.813117	0.844183	0.893226	0.207		1015.8		0	0	0	0		3.3663
	0	0.945688	0.944833	0.945403	0.941554	0.948396	0.1057		0	0.517097	0.997567	1.00014	0.999324	1.00568	0.172		0.0256	0.8638	1.4416	1.5242	1.8351	2.3258		0	0.529644	0.8166	0.703982	0.707691	0.770449	0.171		1016.4		0	0	0	0		3.16593
Standard deviation of CBL12	0	0.0012228	0.00375906	0.00568849	0.0040776	0.00286646	0.0001	Standard deviation of CBL12	0	0.0332685	0.00740703	0.00424873	0.019859	0.00267302	0.0632166	Standard deviation of CBL12	0.0494765	0.0629052	0.0877644	0.0613221	0.0540933	0.0234359	Standard deviation of CBL12	0	0.0259595	0.0116431	0.0622105	0.0763456	0.0653331	0.0184481	Standard deviation of CBL12	0.550757	Standard deviation of CBL12	0	0	0	0	Standard deviation of CBL7	0.43
CBL12-2	0	0.483387	0.546779	0.698484	0.777907	0.844943	0.258	CBL12-2	0	0.751705	0.823372	0.997861	1.00267	1.00936	0.057	CBL12-2	0.0162	0.3388	0.5604	0.8741	1.2483	1.3628	CBL12-2	0	-0.0112747	0.132729	0.136426	0.275466	0.578181	0.957	CBL12-2	963.9	CBL12-2	13	14	15	15	CBL9	10.1522
	0	0.433609	0.565949	0.708026	0.770139	0.859988	0.284		0	0.617778	0.873611	0.995417	1.00486	1.00694	0.16		0.0236	0.4291	0.5729	0.8955	1.1269	1.3116		0	0.0532288	0.172394	0.1891	0.281615	0.482	1.08		963.1		15	16	17	13		10.0581
	0	0.31787	0.557498	0.706	0.774257	0.840902	0.339		0	0.61378	0.928812	1.00955	0.999193	1.00269	0.172		0.0308	0.3354	0.657	0.8544	1.0894	1.2658		0	0.0950268	0.0790662	0.2054	0.357196	0.426389	1.1		962.9		20	15	14	14		10.2853
Standard deviation of CBL12-2	0	0.0849207	0.00960696	0.00502709	0.00388666	0.010058	0.0413562	Standard deviation of CBL12-2	0	0.0785023	0.0527393	0.00755646	0.0028588	0.00337601	0.0632166	Standard deviation of CBL12-2	0.00730023	0.0531434	0.0525367	0.0205559	0.0830596	0.048525	Standard deviation of CBL12-2	0	0.0535534	0.0468387	0.0360503	0.0455162	0.0767942	0.077436	Standard deviation of CBL12-2	0.52915	Standard deviation of CBL12-2	3.60555	1	1.52753	1	Standard deviation of CBL9	0.11
Ascorbic acid	0	0.972711	0.951983	0.968685	0.966597	0.970027	0.1028	Ascorbic acid	0	0.937526	0.995205	0.997534	0.994246	0.994794	0.1067	Ascorbic acid	2.3495	2.3388	2.7854	2.7999	2.6557	2.1676	Ascorbic acid	0	0.143362	0.382093	0.27168	0.350485	0.427951	0.996	Vitamin C	1034.9	Ampicillin	25	40	24	34	CBL11	52.4203
	0	0.966354	0.970108	0.971119	0.969531	0.969531	0.1035		0	0.883343	0.992709	0.991167	0.996635	0.990746	0.1132		2.2515	2.3894	2.7566	2.804	2.7251	2.329		0	0.174951	0.4017	0.298946	0.408293	0.734105	0.952		1034.7		27	39	25	35		48.029
	0	0.966796	0.964367	0.974895	0.959508	0.96631	0.1034		0	0.926244	0.996728	0.993456	0.999455	0.996319	0.108		2.1889	2.3704	2.796	2.7962	2.7922	2.3635		0	0.220518	0.439213	0.2777	0.304845	0.596082	0.886		1033.8		29	25	26	37		51.883
Standard deviation of Ascorbic acid	0	0.00354952	0.0092631	0.00312903	0.00515313	0.00201781	0.000378594	Standard deviation of Ascorbic acid	0	0.0285879	0.00202907	0.00322526	0.00260741	0.00288013	0.00343948	Standard deviation of Ascorbic acid	0.0809476	0.0255601	0.0203886	0.00390171	0.0682532	0.104576	Standard deviation of Ascorbic acid	0	0.0387884	0.0143242	0.0518433	0.0290241	0.153323	0.0553655	Standard deviation of Vitamin C	0.585947	Standard deviation of Ampicillin	27	34.6667	25	35.3333	Standard deviation of CBL11	2.4
																																	Methanol	0	0	0	0	CBL12	10.1401
																																		0	0	0	0		11.8103
																																		0	0	0	0		9.98077
																																	Standard deviation of Methanol	0	0	0	0	Standard deviation of CBL12	1.01
																																						CBL12-2	9.99517
																																							10.0354
																																							10.5631
																																						Standard deviation of CBL12-2	0.32
